# Supplementary material for: Antimicrobial and biocompatible potential of peracetic acid as a novel root canal irrigant
Source: Research Square preprint supplement (doi:10.21203/rs.3.rs-7911128/v1), 2025-11-11
Supplement: Supplementary file 1 [file 17c6baacd4722b3efbbd6172.docx]

**Table S1.** **Quantitative polymerase chain reaction for calibration curve**

| **Target** | **Cq (∆Rn)** | **Tm Product 1 (-Rn'(T)) (℃)** | **CFU** |
| --- | --- | --- | --- |
| *Enterococcus faecalis* | 15.18 | 82.5 | 2.008×10⁶ |
| *Enterococcus faecalis* | 18.79 | 82.5 | 2.008×10⁵ |
| *Enterococcus faecalis* | 21.79 | 82.5 | 2.008×10⁴ |
| *Enterococcus faecalis* | 27.96 | 82.5 | 2.008×10³ |
| *Enterococcus faecalis* | 34.18 | 82.5 | 2.008×10² |

The Cq value corresponding to CFU of *E. faecalis* was measured. CFU, colony forming unit; Cq, quantification cycle; -Rn’/dT, derivative fluorescence; ∆Rn, change in normalized reporter signal; Tm, melting temperature.

Note: Cq values represent the cycle number at which the fluorescence signal exceeds the threshold, based on ∆Rn. Tm values represent the temperature at which 50% of the polymerase chain reaction product is denatured.


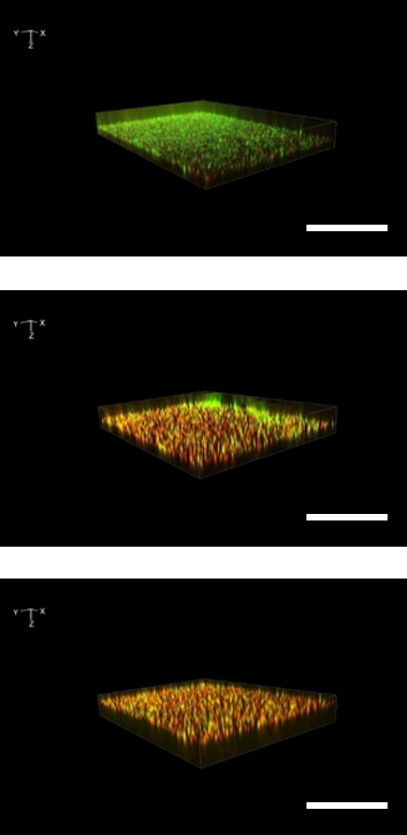


**Supplementary Figure 1. Live/dead staining of bacteria after treatment with Actril**

Triplicated images obtained after treatment with Actril at 100× magnification. Green fluorescence indicates live bacteria, and red fluorescence indicates dead bacteria. Scale bar =100 µm.
